# Supplementary material
Source: publisher site journal article supplement (https://www.dovepress.com/article/284689)
Supplement: Supplementary file 1 [file get_supplementary_file.php]

Appendix 1 Grey literature resources.

| Abbreviation | Full name | URL |
| --- | --- | --- |
| WHO | World Health Organization | <https://www.who.int/ar> |
| WHO-AFRO | World Health Organization Regional Office for Africa | <https://www.afro.who.int/> |
| WHO-EMRO | World Health Organization for the Eastern Mediterranean | <http://www.emro.who.int/index.html> |
| PAHO | Pan-American Health Organization | <https://www.paho.org/spc-crb/> |
| MENA-NCCN | Middle East - North Africa National Comprehensive Cancer Network | <http://ngha.med.sa/English/Centers/MENANCCN/Pages/default.aspx> |
| IOF | International Osteoporosis Foundation | <https://www.iofbonehealth.org/> |
| MOH-Bahrain | Ministry of Health: Kingdom of Bahrain | <https://www.moh.gov.bh/> |
| MOH- Syria | Ministry of Health: Syria | <http://www.moh.gov.sy/Default.aspx?tabid=246&language=en-US> |
| MOH- Kuwait | Ministry of Health: Kuwait | <https://www.moh.gov.kw/> |
| MOH- Jordan | Ministry of Health: Jordan | <http://www.moh.gov.jo/> |
| MOH- Lebanon | Ministry of Health: Lebanon | <https://www.moph.gov.lb/> |
| MOH- Morocco | Ministry of Health: Morocco | <https://www.sante.gov.ma/Pages/Accueil.aspx> |
| MOH- Libya | Ministry of Health, Information and Documentation Center: Libya | <http://seha.ly/en/> |
| FMOH- Sudan | Federal Ministry of Health: Sudan | <http://www.fmoh.gov.sd/> |
| MOH- Tunisia | Ministry of Public Health: Tunisia | <http://www.santetunisie.rns.tn/fr/> |
| MOH- Yemen | Ministry of Public Health & Population: Yemen | <http://moh.gov.ye/english/> |
| MOH- SA | Ministry of Health: Saudi Arabia | <https://www.moh.gov.sa/en/Pages/default.aspx> |
| MOH- Emirates | Ministry of Health: United Arab Emirates | <http://www.mohap.gov.ae/en/Pages/default.aspx> |
| MOH- Palestine | Ministry of Health: Palestine | <http://site.moh.ps/> |
