# Supplementary material
Source: publisher site journal article supplement (https://www.dovepress.com/article/284689)
Supplement: Supplementary file 2 [file get_supplementary_file.php]

Appendix 2 search strategy.

| Generated using PubMed Advanced Search Builder | ((((((((((((((((((((((((((((((((((((((((((((((CPG*) OR Clinical Practice Guideline*) OR Clinical guideline*) OR Guideline*) OR Practice Guideline*) AND Middle East*) OR Algeria*) OR Bahrain*) OR Kingdom of Bahrain) OR Djibouti) OR Egypt*) OR Arab Republic of Egypt) OR Iran*) OR Islamic Republic of Iran) OR Iraq*) OR Syrian Arab Republic) OR Syria*) OR Kuwait*) OR Hashemite Kingdom of Jordan) OR Jordan) OR Leban*) OR Lebanon) OR Morocco) OR Maghreb) OR Maghrib) OR Libya) OR Qatar) OR Somalia*) OR Sudan) OR Tunisia) OR Tunis) OR Saudi Arabia*) OR Kingdom of Saudi Arabia) OR Saudi) OR Yemen) OR United Arab Emirates) OR Emirat*) OR Palestine) OR Occupied Palestinian Territory) OR Israel) OR Gaza) OR Gazah) OR Gaza and the West Bank) OR The West Bank) OR Gulf Cooperation Council) OR Gulf) OR GCC |
| --- | --- |
