# Supplementary material
Source: publisher site journal article supplement (https://www.dovepress.com/article/284689)
Supplement: Supplementary file 3 [file get_supplementary_file.php]

Appendix 3

Disaggregated domain scores (%) for the 61 CPGs using the AGREE II Instrument

|  | Domains | | | | | | |
| --- | --- | --- | --- | --- | --- | --- | --- |
| D1 | D2 | D3 | D4 | D5 | D6 | OA 1 |
| Haddad et al (1). | 86 | 42 | 8 | 89 | 6 | 100 | 50 |
| Jazieh et al (2). | 58 | 58 | 13 | 83 | 23 | 75 | 42 |
| Al Amro et al (3). | 86 | 72 | 14 | 72 | 27 | 75 | 42 |
| Abusamra et al (4). | 72 | 61 | 18 | 86 | 6 | 100 | 25 |
| Alharbi et al (5). | 61 | 56 | 2 | 64 | 8 | 100 | 25 |
| Bazarbashi et al (6). | 44 | 58 | 2 | 64 | 4 | 100 | 8 |
| Husni et al (7). | 83 | 56 | 20 | 83 | 17 | 63 | 58 |
| Jazieh et al (8). | 14 | 22 | 8 | 92 | 6 | 100 | 33 |
| Al-Hameed et al (9). | 100 | 78 | 35 | 86 | 17 | 100 | 42 |
| Al-Jahdali et al (10). | 47 | 56 | 19 | 89 | 15 | 100 | 50 |
| Bashiri et al (11). | 100 | 56 | 48 | 69 | 40 | 75 | 58 |
| Al-Jazairi et al (12). | 83 | 56 | 1 | 83 | 10 | 50 | 33 |
| Al-Hameed et al (13). | 89 | 69 | 42 | 67 | 35 | 8 | 58 |
| Alfadda et al (14). | 86 | 75 | 31 | 75 | 19 | 100 | 58 |
| Alotaibi et al (15). | 44 | 53 | 2 | 61 | 2 | 100 | 17 |
| Alfadhel et al (16). | 61 | 53 | 16 | 92 | 6 | 100 | 33 |
| Al-Moamary et al (17). | 78 | 39 | 16 | 86 | 38 | 54 | 50 |
| Al-Salam et al (18). | 75 | 28 | 4 | 39 | 13 | 100 | 8 |
| Al-Mandeel et al (19). | 89 | 81 | 61 | 72 | 35 | 96 | 75 |
| Alavian et al (20). | 28 | 28 | 20 | 61 | 25 | 0 | 33 |
| Alsanea et al (21). | 100 | 50 | 32 | 72 | 23 | 21 | 42 |
| Al-Hameed et al (22). | 83 | 56 | 38 | 69 | 33 | 25 | 50 |
| Al-Hameed et al (23). | 56 | 75 | 71 | 58 | 33 | 83 | 83 |
| Al-Saleh et al (24). | 17 | 22 | 20 | 86 | 17 | 63 | 33 |
| Al-Hameed et al (25). | 61 | 69 | 31 | 64 | 42 | 79 | 25 |
| Alothman et al (26). | 44 | 25 | 16 | 75 | 23 | 58 | 17 |
| Ibrahim et al (27). | 42 | 50 | 9 | 75 | 40 | 100 | 42 |
| Khan e al (28). | 3 | 14 | 21 | 89 | 4 | 50 | 25 |
| Khan et al (29). | 61 | 67 | 48 | 100 | 52 | 100 | 92 |
| Al-Abdely et al (30). | 61 | 33 | 49 | 100 | 71 | 96 | 92 |
| Moghnieh et al (31). | 67 | 58 | 48 | 100 | 25 | 46 | 33 |
| Idrees et al (32). | 72 | 67 | 46 | 100 | 73 | 100 | 67 |
| Abdo et al (33). | 53 | 50 | 54 | 100 | 56 | 25 | 83 |
| Al Jahdali et al (34). | 69 | 28 | 19 | 97 | 23 | 0 | 67 |
| Bohlega et al (35). | 53 | 36 | 51 | 94 | 31 | 50 | 75 |
| Okasha et al (36). | 28 | 69 | 51 | 94 | 33 | 50 | 75 |
| Shatila et al (37). | 42 | 33 | 16 | 64 | 23 | 50 | 33 |
| Jassim et al (38). | 44 | 33 | 11 | 75 | 23 | 46 | 42 |
| Jordanian Osteoporosis Prevention Society (39). | 100 | 33 | 9 | 97 | 31 | 0 | 42 |
| EBHC guidelines on Venous Thromboembolism in Patients with Stroke (40). | 89 | 89 | 64 | 100 | 52 | 96 | 92 |
| EBHC guideline on Allergic Rhinitis in Asthma (41). | 78 | 97 | 65 | 97 | 48 | 96 | 92 |
| EBHC guideline on the Diagnosis of First Deep Vein Thrombosis of Lower Extremity (42). | 69 | 92 | 57 | 97 | 75 | 96 | 75 |
| EBHC guideline on the Use of Thrombolytic Therapy in Acute Stroke (43). | 72 | 81 | 67 | 100 | 63 | 100 | 92 |
| EBHC guideline on Fracture Prevention in Elderly (44). | 89 | 94 | 60 | 100 | 46 | 96 | 92 |
| EBHC guideline on Antithrombotic Treatment in Atrial Fibrillation (45). | 89 | 92 | 69 | 100 | 50 | 100 | 92 |
| EBHC guideline on the Treatment of Venous Thromboembolism (46). | 72 | 92 | 69 | 83 | 63 | 96 | 92 |
| EBHC guideline on Screening Strategies for Breast Cancer (47). | 89 | 92 | 40 | 100 | 48 | 100 | 83 |
| Alhasan et al (48). | 89 | 92 | 40 | 100 | 48 | 100 | 83 |
| Bahrain MOH guidelines on Middle East Respiratory Syndrome coronavirus (49). | 61 | 33 | 4 | 61 | 15 | 0 | 25 |
| Bahrain MOH guidelines for Management of Suspected or Confirmed Cholera (50) . | 50 | 50 | 0 | 78 | 10 | 0 | 50 |
| Bahrain MOH guidelines for Management of Influenza A (H1N1) (51). | 42 | 50 | 1 | 64 | 4 | 0 | 42 |
| Lebanese Ministry of public health guidelines for Tuberculosis Prevention and care (52). | 67 | 47 | 10 | 94 | 52 | 0 | 58 |
| Ziadé et al (53). | 61 | 17 | 19 | 86 | 8 | 0 | 33 |
| Mokhbat et al (54). | 69 | 17 | 9 | 94 | 19 | 0 | 50 |
| Fuleihan et al (55). | 67 | 33 | 2 | 83 | 0 | 0 | 58 |
| Abulkhair et al (56). | 47 | 33 | 22 | 97 | 21 | 42 | 58 |
| Yusuf et al (57). | 33 | 31 | 15 | 78 | 40 | 25 | 42 |
| Bazarbachi et al (58). | 50 | 31 | 21 | 75 | 23 | 0 | 42 |
| Hassen et al (59). | 36 | 31 | 9 | 42 | 10 | 0 | 42 |
| İçli et al (60). | 50 | 33 | 26 | 75 | 29 | 0 | 42 |
| Jazieh et al (61). | 44 | 31 | 20 | 78 | 10 | 0 | 50 |
| EBHC= Evidence Based Health Care, MOH=Ministry of Health | | | | | | | |

References

1. Haddad N, Kanj SS, Awad LS, Abdallah DI, Moghnieh RA. The 2018 Lebanese Society of Infectious Diseases and Clinical Microbiology Guidelines for the use of antimicrobial therapy in complicated intra-abdominal infections in the era of antimicrobial resistance. BMC Infect Dis. 2019;19(1):293.

2. Jazieh A, Alghamdi M, Alghanem S, Algarni M, Alkattan K, Alrujaib M, et al. Saudi lung cancer prevention and screening guidelines. Ann Thorac Med. 2018;13(4):198–204.

3. Al Amro SA, Al Aql F, Al Hajar S, Al Dhibi H, Al Nemri A, Mousa A, et al. Practical guidelines for screening and treatment of retinopathy of prematurity in Saudi Arabia. Saudi J Ophthalmol. 2018;32(3):222–6.

4. Abusamra A, Murshid E, Kushi H, Alkhateeb S, Al-Mansour M, Saadeddin A, et al. Saudi oncology society and Saudi urology association combined clinical management guidelines for prostate cancer. Urol Ann. 2016;10(2):138–45.

5. Alharbi H, Alkhateeb S, Murshid E, Alotaibi M, Abusamra A, Rabah D, et al. Saudi Oncology Society and Saudi Urology Association combined clinical management guidelines for urothelial cell carcinoma of the urinary bladder 2017. Urol Ann. 2018;10(2):133.

6. Bazarbashi S, Alkhateeb S, Abusamra A, Rabah D, Alotaibi M, Almansour M, et al. Saudi oncology society and Saudi urology association combined clinical management guidelines for renal cell carcinoma. Urol Ann. 2014;6(4):286.

7. Husni R, Atoui R, Choucair J, Moghnieh R, Mokhbat J, Tabbarah Z, et al. The Lebanese Society of Infectious Diseases and Clinical Microbiology: Guidelines for the treatment of urinary tract infections. Leban Med J. 2017;103(5521):1–12.

8. Jazieh AR, Al Kattan K, Bamousa A, Al Olayan A, Abdelwarith A, Ansari J, et al. Saudi lung cancer management guidelines 2017. Ann Thorac Med. 2017;12(4):221.

9. Al-Hameed FM, Al-Dorzi HM, Abdelaal MA, Alaklabi A, Bakhsh E, Alomi YA, et al. The saudi clinical practice guideline for the prophylaxis of venous thromboembolism in long-distance travelers. Saudi Med J. 2017;38(1):101–107.

10. Al-Jahdali H, Alshimemeri A, Mobeireek A, Albanna AS, Al Shirawi NN, Wali S, et al. The Saudi Thoracic Society guidelines for diagnosis and management of noncystic fibrosis bronchiectasis. Ann Thorac Med. 2017;12(3):135.

11. Bashiri FA, Hamad MH, Amer YS, Abouelkheir MM, Mohamed S, Kentab AY, et al. Management of convulsive status epilepticus in children: an adapted clinical practice guideline for pediatricians in Saudi Arabia. Neurosciences. 2017;22(2):146.

12. Al-Jazairi A, Al-Jaser R, Al-Halees Z, Shahid M, Al-Jufan M, Al-Mayouf S, et al. Guidelines for the secondary prevention of rheumatic heart disease: Endorsed by Saudi Pediatric Infectious Diseases Society (SPIDS). Int J Pediatr Adolesc Med. 2017;4(1):47–50.

13. Al-Hameed FM, Al-Dorzi HM, Abdelaal MA, Alaklabi A, Bakhsh E, Alomi YA, et al. The Saudi clinical practice guideline for the prophylaxis of venous thromboembolism in medical and critically ill patients. Saudi Med J. 2016;37(11):1279.

14. Alfadda AA, Al-Dhwayan MM, Alharbi AA, Al Khudhair BK, Al Nozha OM, Al-Qahtani NM, et al. The Saudi clinical practice guideline for the management of overweight and obesity in adults. Saudi Med J. 2016;37(10):1151.

15. Alotaibi M, Saadeddin A, Bazarbashi S, Alkhateeb S, Alghamdi A, Alghamdi K, et al. Saudi Oncology Society and Saudi Urology Association combined clinical management guidelines for testicular germ cell tumors. Urol Ann. 2016;8(2).

16. Alfadhel M, Al Mutairi F, Makhseed N, Al Jasmi F, Al-Thihli K, Al-Jishi E, et al. Guidelines for acute management of hyperammonemia in the Middle East region. Ther Clin Risk Manag. 2016;12:479.

17. Al-Moamary MS, Alhaider SA, Idrees MM, Al Ghobain MO, Zeitouni MO, Al-Harbi AS, et al. The Saudi Initiative for Asthma-2016 update: Guidelines for the diagnosis and management of asthma in adults and children. Ann Thorac Med. 2016;11(1):3.

18. Al-Salam Z, Al-Alaiyan S, Alallah J, Al-Hazzani F, Alfaleh K, Alsaedi S, et al. The golden hour approach: Practical guidelines of the Saudi neonatology society on managing very low birth weight infants in the first hour of life. J Clin Neonatol. 2016;5(4):222.

19. Al-Mandeel HM, Sagr E, Sait K, Latifah HM, Al-Obaid A, Al-Badawi IA, et al. Clinical practice guidelines on the screening and treatment of precancerous lesions for cervical cancer prevention in Saudi Arabia. Ann Saudi Med. 2016;36(5):313–20.

20. Alavian SM, Hajarizadeh B, Lankarani KB, Sharafi H, Daryani NE, Merat S, et al. Recommendations for the clinical management of hepatitis C in Iran: a consensus-based national guideline. Hepat Mon. 2016;16(8).

21. Alsanea N, Almadi MA, Abduljabbar AS, Alhomoud S, Alshaban TA, Alsuhaibani A, et al. National Guidelines for Colorectal Cancer Screening in Saudi Arabia with strength of recommendations and quality of evidence: Tripartite Task Force from Saudi Society of Colon & Rectal Surgery, Saudi Gastroenterology Association and Saudi Oncology Society. Ann Saudi Med. 2015;35(3):189–95.

22. Al-Hameed F, Al-Dorzi HM, Al Momen A, Algahtani F, Al Zahrani H, Al Saleh K, et al. Prophylaxis and treatment of venous thromboembolism in patients with cancer: the Saudi clinical practice guideline. Ann Saudi Med. 2015;35(2):95–106.

23. Al-Hameed F, Al-Dorzi HM, Shamy A, Qadi A, Bakhsh E, Aboelnazar E, et al. The Saudi clinical practice guideline for the diagnosis of the first deep venous thrombosis of the lower extremity. Ann Thorac Med. 2015;10(1):3.

24. Al-Saleh Y, Sulimani R, Sabico S, Raef H, Fouda M, Alshahrani F, et al. 2015 guidelines for osteoporosis in Saudi Arabia: recommendations from the Saudi Osteoporosis Society. Ann Saudi Med. 2015;35(1):1–12.

25. Al-Hameed FM, Al-Dorzi HM, Al-Momen AM, Algahtani FH, Al-Zahrani HA, Al-Saleh KA, et al. The Saudi Clinical Practice Guideline for the treatment of venous thromboembolism: Outpatient versus inpatient management. Saudi Med J. 2015;36(8):1004.

26. Alothman AF, Al-Musawi T, Al-Abdely HM, Al Salman J, Almaslamani M, Yared N, et al. Clinical practice guidelines for the management of invasive Candida infections in adults in the Middle East region: expert panel recommendations. J Infect Public Health. 2014;7(1):6–19.

27. Ibrahim MM. Egyptian hypertension guidelines. Egypt Hear J. 2014;66:79–132.

28. Khan J, Idrees MM. Saudi Guidelines on the Diagnosis and Treatment of Pulmonary Hypertension: Pregnancy in pulmonary hypertension. Ann Thorac Med. 2014;9(Suppl 1):S108.

29. Khan JH, Lababidi HMS, Al-Moamary MS, Zeitouni MO, Al-Jahdali HH, Al-Amoudi OS, et al. The Saudi guidelines for the diagnosis and management of COPD. Ann Thorac Med. 2014;9(2):55.

30. Al-Abdely HM, Alothman AF, Al Salman J, Al-Musawi T, Almaslamani M, Butt AA, et al. Clinical practice guidelines for the treatment of invasive Aspergillus infections in adults in the Middle East region: Expert panel recommendations. J Infect Public Health. 2014;7(1):20–31.

31. Moghnieh R, Sakr NY, Kanj SS, Musharrafieh U, Husni R. The Lebanese Society for Infectious Diseases and Clinical Microbiology (LSIDCM) guidelines for adult community-acquired pneumonia (CAP) in Lebanon. Leban Med J. 2014;103(1006):1–8.

32. Idrees MM, Saleemi S, Azem MA, Aldammas S, Alhazmi M, Khan J, et al. Saudi guidelines on the diagnosis and treatment of pulmonary hypertension: 2014 updates. Ann Thorac Med. 2014;9(Suppl 1):S1.

33. Abdo AA, Hassanain M, AlJumah A, Al Olayan A, Sanai FM, Al Alsuhaibani H, et al. Saudi Guidelines for the Diagnosis and Management of Hepatocellular Carcinoma: Technical Review and Practice Guidelines: Created and endorsed by the Saudi Association for the Study of Liver Diseases and Transplantation and the Saudi Oncology Society. Ann Saudi Med. 2012;32(2):174–99.

34. Al Jahdali HH, Baharoon S, Abba AA, Memish ZA, Alrajhi AA, AlBarrak A, et al. Saudi guidelines for testing and treatment of latent tuberculosis infection. Ann Saudi Med. 2010;30(1):38–49.

35. Bohlega S, Alsaadi T, Amir A, Hosny H, Karawagh AM, Moulin D, et al. Guidelines for the pharmacological treatment of peripheral neuropathic pain: expert panel recommendations for the middle East region. J Int Med Res. 2010;38(2):295–317.

36. Okasha A, Alkhadhari S, Al Sharqi A, Al Sherif T, Asaad T, Hachem DG, et al. Arab Treatment Guidelines for the Management of Major Depressive Disorder. Arab J Psychiatry. 2017;44(5487):1–21.

37. Shatila AR, Koussa S, Jabbour R, Mourad A, Aouad A, Sabbagh G, et al. LSN MS guidelines for the management of multiple sclerosis. Rev Neurol (Paris). 2013;169(12):950–5.

38. Jassim NA, Adib G, Rahman YAA, Gorial FI, Maghraoui A, Al Suhaili AR, et al. Pan Arab Osteoporosis Society Guidelines for Osteoporosis Management. Mediterr J Rheumatol. 2017;28(1):27.

39. Jordanian Osteoporosis Prevention Society. The practical guide for mangament of osteoporosis. 2016.

40. The Saudi Center for Evidence Based Health Care. Clinical Practice Guideline on Prevention of Venous Thromboembolism in Patients with Stroke. 2014.

41. The Saudi Center for Evidence Based Health Care. Clinical Practice Guideline on Allergic Rhinitis in Asthma. 2014.

42. Saudi Ministry of Health (MOH). Clinical Practice Guideline on the Diagnosis of Suspected First Deep Vein Thrombosis of Lower Extremity: Saudi Center for Evidence based Healthcare. 2014.

43. The Saudi Center for Evidence Based Health Care. Clinical Practice Guideline on the Use of Thrombolytic Therapy in Acute Stroke. 2014.

44. The Saudi Center for Evidence Based Health Care. Clinical Practice Guideline on the Role of Vitamin D, Calcium and Exercise in Fracture Prevention in Elderly. 2014.

45. The Saudi Center for Evidence Based Health Care. Clinical Practice Guideline on Antithrombotic Treatment of Patients with Non-valvular Atrial Fibrillation. 2014.

46. The Saudi Center for Evidence Based Health Care. Clinical Practice Guideline on the Treatment of Venous Thromboembolism. 2014.

47. The Saudi Center for Evidence Based Health Care. Clinical Practice Guideline on the Use of Screening Strategies for the Detection of Breast Cancer. 2014.

48. The Saudi Center for Evidence Based Health Care. Clinical Practice Guideline on the Timing of Initiation of Dialysis. 2015.

49. Ministry of Health Kingdom of Bahrain. Guideline On Middle East Respiratory Syndrome coronavirus (MERS-CoV). 2014.

50. Ministry of Health Kingdom of Bahrain. Guideline for Management of Suspected or Confirmed Cholera. 2015.

51. Ministry of Health Kingdom of Bahrain. Management of Influenza A (H1N1) and Influenza like Illness (ILI). 2015.

52. Ministry of public health. National Guidelines for Tuberculosis Prevention, Care and Elimination in Lebanon. 2017.

53. Ziadé N, Menassa J, Saliba G, Baraliakos X, Ramiro S, Chatzidionysiou K. Protocol for prescription and follow up of biologics and targeted Synthetic Disease Modifying Anti-Rheumatic Drugs (b/tsDMARDS) in the management of Chronic Inflammatory Rheumatic Diseases (RA, axSpA, PsA). 2018.

54. Mokhbat JE. National Guidelines for diagnosis and management of HIV infected adults ANTIRETROVIRAL THERAPY MANAGEMENT. 2012.

55. Fuleihan GE-H. FRAX Based Lebanese Osteoporosis Guidelines [Internet]. 2013. Available from: https://www.moph.gov.lb/userfiles/files/Quality%26Safety/OsteoporosisAssessment%26Treatment/FRAX-guidelines.pdf

56. Abulkhair O, Saghir N, Sedky L, Saadedin A, Elzahwary H, Siddiqui N, et al. Modification and implementation of NCCN guidelinesTM on breast cancer in the Middle East and North Africa region. J Natl Compr Cancer Netw. 2010;8(Suppl_3):S-8.

57. Yusuf MA, Kapoor VK, Kamel RR, Kazmi A, Uddin N, Masood N, et al. Modification and Implementation of NCCN GuidelinesTM on Hepatobiliary Cancers in the Middle East and North Africa Region. J Natl Compr Cancer Netw. 2010;8(Suppl_3):S-36.

58. Bazarbachi A, Azim HA, Alizadeh H, Aljurf M, Barista I, Chaudhri NA, et al. Modification and Implementation of NCCN GuidelinesTM on Lymphomas in the Middle East and North Africa Region. J Natl Compr Cancer Netw. 2010;8(Suppl_3):S-29.

59. Hassen WA, Karsan FA, Abbas F, Beduk Y, El-Khodary A, Ghosn M, et al. Modification and Implementation of NCCN GuidelinesTM on Prostate Cancer in the Middle East and North Africa Region. J Natl Compr Cancer Netw. 2010;8(Suppl_3):S-26.

60. İçli F, Akbulut H, Bazarbashi S, Kuzu MA, Mallath MK, Rasul KI, et al. Modification and Implementation of NCCN GuidelinesTM on Colon Cancer in the Middle East and North Africa Region. J Natl Compr Cancer Netw. 2010;8(Suppl_3):S-22.

61. Jazieh A-R, Bamefleh H, Demirkazik A, Gaafar RM, Geara FB, Javaid M, et al. Modification and Implementation of NCCN GuidelinesTM on Non–Small Cell Lung Cancer in the Middle East and North Africa Region. J Natl Compr Cancer Netw. 2010;8(Suppl_3):S-16.
